# Supplementary material for: TLRs Gene Polymorphisms Associated with Pneumonia before and during COVID-19 Pandemic
Source: MDPI journal article supplement (doi:10.3390/diagnostics13010121), 2022-12-30
Supplement: s1 [file s1]

**Table S1. Comparison results Case 1 and Control groups**

| SNP          | Control | Allele 1<br>freq. | Case 1 | Allele 2<br>freq. | OR CI95%          | p       |
|--------------|---------|-------------------|--------|-------------------|-------------------|---------|
| rs5743551    |         |                   |        |                   |                   |         |
| Codominant   |         |                   |        |                   |                   |         |
| A/A          | 60      | 60.6              | 40     | 52.6              | 1.00              | 0.04523 |
| A/G          | 32      | 32.3              | 35     | 46.1              | 1.64(0.88-3.06)   |         |
| G/G          | 7       | 7.1               | 1      | 1.3               | 0.21(0.03-1.81)   |         |
| Dominant     |         |                   |        |                   |                   |         |
| A/A          | 60      | 60.6              | 40     | 52.6              | 1.00              | 0.2909  |
| A/G-G/G      | 39      | 39.4              | 36     | 47.4              | 1.38(0.76-2.53)   |         |
| Recessive    |         |                   |        |                   |                   |         |
| A/A-A/G      | 92      | 92.9              | 75     | 98.7              | 1.00              | 0.05237 |
| G/G          | 7       | 7.1               | 1      | 1.3               | 0.18(0.02-1.46)   |         |
| Overdominant |         |                   |        |                   |                   |         |
| A/A-G/G      | 67      | 67.7              | 41     | 53.9              | 1.00              | 0.06426 |
| A/G          | 32      | 32.3              | 35     | 46.1              | 1.79(0.96-3.31)   |         |
| log-Additive |         |                   |        |                   |                   |         |
| 0,1,2        | 99      | 56.6              | 76     | 43.4              | 1.07(0.64-1.78)   | 0.8032  |
| rs5743708    |         |                   |        |                   |                   |         |
| Codominant   |         |                   |        |                   |                   |         |
| G/G          | 93      | 93.9              | 71     | 93.4              | 1.00              | 0.8888  |
| A/G          | 6       | 6.1               | 5      | 6.6               | 1.09(0.32-3.72)   |         |
| log-Additive |         |                   |        |                   |                   |         |
| 0,1,2        | 99      | 56.6              | 76     | 43.4              | 1.09(0.32-3.72)   |         |
| rs3804100    |         |                   |        |                   |                   |         |
| Codominant   |         |                   |        |                   |                   |         |
| T/T          | 83      | 83.8              | 67     | 88.2              | 1.00              | 0.1044  |
| C/T          | 16      | 16.2              | 7      | 9.2               | 0.54(0.21-1.39)   |         |
| C/C          | 0       | 0.0               | 2      | 2.6               | 2.44 (0.29-131.0) |         |
| Dominant     |         |                   |        |                   |                   |         |
| T/T          | 83      | 83.8              | 67     | 88.2              | 1.00              | 0.4149  |
| C/T-C/C      | 16      | 16.2              | 9      | 11.8              | 0.70(0.29-1.68)   |         |
| Recessive    |         |                   |        |                   |                   |         |
| T/T-C/T      | 99      | 100.0             | 74     | 97.4              | 1.00              | 0.1872  |
| C/C          | 0       | 0.0               | 2      | 2.6               | 2.64(032-141.2)   |         |
| Overdominant |         |                   |        |                   |                   |         |
| T/T-C/C      | 83      | 83.8              | 69     | 90.8              | 1.00              | 0.1706  |
| C/T          | 16      | 16.2              | 7      | 9.2               | 0.53(0.20-1.35)   |         |
| log-Additive |         |                   |        |                   |                   |         |
| 0,1,2        | 99      | 56.6              | 76     | 43.4              | 0.89(0.41-1.93)   | 0.1044  |
| rs4986790    |         |                   |        |                   |                   |         |
| Codominant   |         |                   |        |                   |                   |         |
| A/A          | 82      | 82.8              | 66     | 86.8              | 1.00              | 0.4148  |
| A/G          | 16      | 16.2              | 8      | 10.5              | 0.62(0.25-1.54)   |         |
| G/G          | 1       | 1.0               | 2      | 2.6               | 2.48(0.22-28.01)  |         |
| Dominant     |         |                   |        |                   |                   |         |

|              |    |      |    |      |                  |                        |
|--------------|----|------|----|------|------------------|------------------------|
| A/A          | 82 | 82.8 | 66 | 86.8 | 1.00             | 0.4636                 |
| A/G-G/G      | 17 | 17.2 | 10 | 13.2 | 0.73(0.31-1.70)  |                        |
| Recessive    |    |      |    |      |                  |                        |
| A/A-A/G      | 98 | 99.0 | 74 | 97.4 | 1.00             | 0.4138                 |
| G/G          | 1  | 1.0  | 2  | 2.6  | 2.65(0.24-29.77) |                        |
| Overdominant |    |      |    |      |                  |                        |
| A/A-G/G      | 83 | 83.8 | 68 | 89.5 | 1.00             | 0.2775                 |
| A/G          | 16 | 16.2 | 8  | 10.5 | 0.61(0.25-1.51)  |                        |
| log-Additive |    |      |    |      |                  |                        |
| 0,1,2        | 99 | 56.6 | 76 | 43.4 | 0.87(0.42-1.79)  | 0.7077                 |
| rs5743810    |    |      |    |      |                  |                        |
| Codominant   |    |      |    |      |                  |                        |
| G/G          | 44 | 44.4 | 31 | 40.8 | 1.00             | 0.7715                 |
| A/G          | 44 | 44.4 | 34 | 44.7 | 1.10(0.58-2.08)  |                        |
| A/A          | 11 | 11.1 | 11 | 14.5 | 1.42(0.55-3.68)  |                        |
| Dominant     |    |      |    |      |                  |                        |
| G/G          | 44 | 44.4 | 31 | 40.8 | 1.00             | 0.628                  |
| A/G-A/A      | 55 | 55.6 | 45 | 59.2 | 1.16(0.63-2.13)  |                        |
| Recessive    |    |      |    |      |                  |                        |
| G/G-A/G      | 88 | 88.9 | 65 | 85.5 | 1.00             | 0.5076                 |
| A/A          | 11 | 11.1 | 11 | 14.5 | 1.35(0.55-3.31)  |                        |
| Overdominant |    |      |    |      |                  |                        |
| G/G-A/A      | 55 | 55.6 | 42 | 55.3 | 1.00             | 0.9692                 |
| A/G          | 44 | 44.4 | 34 | 44.7 | 1.01(0.55-1.85)  |                        |
| log-Additive |    |      |    |      |                  |                        |
| 0,1,2        | 99 | 56.6 | 76 | 43.4 | 1.16(0.75-1.81)  | 0.4989                 |
| rs3764880    |    |      |    |      |                  |                        |
| Codominant   |    |      |    |      |                  |                        |
| A/A          | 64 | 64.6 | 52 | 68.4 | 1.00             | 1.568×10 <sup>-6</sup> |
| A/G          | 30 | 30.3 | 5  | 6.6  | 0.21(0.07-0.57)  |                        |
| G/G          | 5  | 5.1  | 19 | 25.0 | 4.68(1.64-13.38) |                        |
| Dominant     |    |      |    |      |                  |                        |
| A/A          | 64 | 64.6 | 52 | 68.4 | 1.00             | 0.6001                 |
| A/G-G/G      | 35 | 35.4 | 24 | 31.6 | 0.84(0.45-1.59)  |                        |
| Recessive    |    |      |    |      |                  |                        |
| A/A-A/G      | 94 | 94.9 | 57 | 75.0 | 1.00             | 0.0001173              |
| G/G          | 5  | 5.1  | 19 | 25.0 | 6.27(2.22-17.71) |                        |
| Overdominant |    |      |    |      |                  |                        |
| A/A-G/G      | 69 | 69.7 | 71 | 93.4 | 1.00             | 4.133×10 <sup>-5</sup> |
| A/G          | 30 | 30.3 | 5  | 6.6  | 0.16(0.06-0.44)  |                        |
| log-Additive |    |      |    |      |                  |                        |
| 0,1,2        | 99 | 56.6 | 76 | 43.4 | 1.36(0.90-2.06)  | 0.1438                 |

**Table S2.** Comparison results Case 2 and Control groups

| SNP              | Control | Allele 1<br>freq. | Case 2 | Allele 2<br>freq. | OR CI95%         | <i>p</i> |
|------------------|---------|-------------------|--------|-------------------|------------------|----------|
| <b>rs5743551</b> |         |                   |        |                   |                  |          |
| Codominant       |         |                   |        |                   |                  |          |
| A/A              | 60      | 60.6              | 58     | 68.2              | 1.00             | 0.5106   |
| A/G              | 32      | 32.3              | 21     | 24.7              | 0.68(0.35-1.31)  |          |
| G/G              | 7       | 7.1               | 6      | 7.1               | 0.89(0.28-2.80)  |          |
| Dominant         |         |                   |        |                   |                  |          |
| A/A              | 60      | 60.6              | 58     | 68.2              | 1.00             | 0.2811   |
| A/G-G/G          | 39      | 39.4              | 27     | 31.8              | 0.72(0.39-1.32)  |          |
| Recessive        |         |                   |        |                   |                  |          |
| A/A-A/G          | 92      | 92.9              | 79     | 92.9              | 1.00             | 0.9975   |
| G/G              | 7       | 7.1               | 6      | 7.1               | 1.00(0.32-3.09)  |          |
| Overdominant     |         |                   |        |                   |                  |          |
| A/A-G/G          | 67      | 67.7              | 64     | 75.3              | 1.00             | 0.2538   |
| A/G              | 32      | 32.3              | 21     | 24.7              | 0.69(0.36-1.31)  |          |
| log-Additive     |         |                   |        |                   |                  |          |
| 0,1,2            | 99      | 53.8              | 85     | 46.2              | 0.82(0.51-1.31)  | 0.4044   |
| <b>rs5743708</b> |         |                   |        |                   |                  |          |
| Codominant       |         |                   |        |                   |                  |          |
| G/G              | 93      | 93.9              | 82     | 96.5              | 1.00             | 0.4219   |
| A/G              | 6       | 6.1               | 3      | 3.5               | 0.57(0.14-2.34)  |          |
| log-Additive     |         |                   |        |                   |                  |          |
| 0,1,2            | 99      | 53.8              | 85     | 46.2              | 0.57(0.14-2.34)  |          |
| <b>rs3804100</b> |         |                   |        |                   |                  |          |
| Codominant       |         |                   |        |                   |                  |          |
| T/T              | 83      | 83.8              | 80     | 94.1              | 1.00             | 0.02465  |
| C/T              | 16      | 16.2              | 5      | 5.9               | 0.32(0.11-0.93)  |          |
| log-Additive     |         |                   |        |                   |                  |          |
| 0,1,2            | 99      | 53.8              | 85     | 46.2              | 0.32(0.11-0.93)  | 0.02465  |
| <b>rs4986790</b> |         |                   |        |                   |                  |          |
| Codominant       |         |                   |        |                   |                  |          |
| A/A              | 82      | 82.8              | 69     | 81.2              | 1.00             | 0.9576   |
| A/G              | 16      | 16.2              | 15     | 17.6              | 1.11(0.51-2.42)  |          |
| G/G              | 1       | 1.0               | 1      | 1.2               | 1.19(0.07-19.35) |          |
| Dominant         |         |                   |        |                   |                  |          |
| A/A              | 82      | 82.8              | 69     | 81.2              | 1.00             | 0.7711   |
| A/G-G/G          | 17      | 17.2              | 16     | 18.8              | 1.12(0.53-2.38)  |          |
| Recessive        |         |                   |        |                   |                  |          |
| A/A-A/G          | 98      | 99.0              | 84     | 98.8              | 1.00             | 0.9137   |
| G/G              | 1       | 1.0               | 1      | 1.2               | 1.17(0.07-18.94) |          |
| Overdominant     |         |                   |        |                   |                  |          |
| A/A-G/G          | 83      | 83.8              | 70     | 82.4              | 1.00             | 0.7886   |
| A/G              | 16      | 16.2              | 15     | 17.6              | 1.11(0.51-2.41)  |          |
| log-Additive     |         |                   |        |                   |                  |          |

|              |    |      |    |      |                 |        |
|--------------|----|------|----|------|-----------------|--------|
| 0,1,2        | 99 | 53.8 | 85 | 46.2 | 1.11(0.56-2.21) | 0.7695 |
| rs5743810    |    |      |    |      |                 |        |
| Codominant   |    |      |    |      |                 |        |
| G/G          | 44 | 44.4 | 33 | 38.8 | 1.00            | 0.7391 |
| A/G          | 44 | 44.4 | 42 | 49.4 | 1.27(0.69-2.36) |        |
| A/A          | 11 | 11.1 | 10 | 11.8 | 1.21(0.46-3.19) |        |
| Dominant     |    |      |    |      |                 |        |
| G/G          | 44 | 44.4 | 33 | 38.8 | 1.00            | 0.4406 |
| A/G-A/A      | 55 | 55.6 | 52 | 61.2 | 1.26(0.70-2.27) |        |
| Recessive    |    |      |    |      |                 |        |
| G/G-A/G      | 88 | 88.9 | 75 | 88.2 | 1.00            | 0.8895 |
| A/A          | 11 | 11.1 | 10 | 11.8 | 1.07(0.43-2.65) |        |
| Overdominant |    |      |    |      |                 |        |
| G/G-A/A      | 55 | 55.6 | 43 | 50.6 | 1.00            | 0.5007 |
| A/G          | 44 | 44.4 | 42 | 49.4 | 1.22(0.68-2.18) |        |
| log-Additive |    |      |    |      |                 |        |
| 0,1,2        | 99 | 53.8 | 85 | 46.2 | 1.15(0.74-1.79) | 0.5224 |
| rs3764880    |    |      |    |      |                 |        |
| Codominant   |    |      |    |      |                 |        |
| A/A          | 64 | 64.6 | 52 | 61.2 | 1.00            | 0.808  |
| A/G          | 30 | 30.3 | 27 | 31.8 | 1.11(0.59-2.09) |        |
| G/G          | 5  | 5.1  | 6  | 7.1  | 1.48(0.43-5.11) |        |
| Dominant     |    |      |    |      |                 |        |
| A/A          | 64 | 64.6 | 52 | 61.2 | 1.00            | 0.627  |
| A/G-G/G      | 35 | 35.4 | 33 | 38.8 | 1.16(0.64-2.11) |        |
| Recessive    |    |      |    |      |                 |        |
| A/A-A/G      | 94 | 94.9 | 79 | 92.9 | 1.00            | 0.5674 |
| G/G          | 5  | 5.1  | 6  | 7.1  | 1.43(0.42-4.86) |        |
| Overdominant |    |      |    |      |                 |        |
| A/A-G/G      | 69 | 69.7 | 58 | 68.2 | 1.00            | 0.8308 |
| A/G          | 30 | 30.3 | 27 | 31.8 | 1.07(0.57-2.00) |        |
| log-Additive |    |      |    |      |                 |        |
| 0,1,2        | 99 | 53.8 | 85 | 46.2 | 1.16(0.72-1.88) | 0.5398 |
