# Supplementary material for: TLRs Gene Polymorphisms Associated with Pneumonia before and during COVID-19 Pandemic
Source: MDPI journal article supplement (doi:10.3390/diagnostics13010121), 2022-12-30
Supplement: s1 [file s1]

**Supplementary S2.** The comparison of genotype frequencies against the EUR population for all studied SNPs

| SNP        | Genotype              | Samples | Genotype freq. in samples           | Genotype freq. in EUR             | $\chi^2$ (p)                       |
|------------|-----------------------|---------|-------------------------------------|-----------------------------------|------------------------------------|
| rs5743551  | AA/AG/GG              | Case 1  | 0.53/0.46/0.01                      | 0.53/0.36/0.10                    | <b>7.52 (0.023)</b>                |
|            |                       | Case 2  | 0.68/0.25/0.07                      |                                   | <b>6.58 (0.037)</b>                |
|            |                       | Control | 0.61/0.32/0.07                      |                                   | 2.10 (0.350)                       |
| rs5743708  | AG/GG                 | Case 1  | 0.07/0.93                           | 0.05/0.95                         | 0.15 (0.696)                       |
|            |                       | Case 2  | 0.035/0.965                         |                                   | 0.05 (0.821)                       |
|            |                       | Control | 0.06/0.94                           |                                   | 0.08 (0.774)                       |
| rs3804100  | CC/CT/TT              | Case 1  | 0.03/0.09/0.88                      | 0.004/0.1192/0.8767               | 5.19 (0.075)                       |
|            |                       | Case 2  | 0/0.06/0.94                         |                                   | 3.08 (0.214)                       |
|            |                       | Control | 0/0.16/0.84                         |                                   | 1.71 (0.426)                       |
| rs4986790  | AA/AG/GG              | Case 1  | 0.87/0.10/0.03                      | 0.8926/0.1014/0.006               | 3.22 (0.200)                       |
|            |                       | Case 2  | 0.81/0.18/0.01                      |                                   | 4.55 (0.103)                       |
|            |                       | Control | 0.83/0.16/0.01                      |                                   | 3.30 (0.192)                       |
| rs5743810  | AA/AG/GG              | Case 1  | 0.14/0.45/0.41                      | 0.17/0.47/0.36                    | 0.86 (0.650)                       |
|            |                       | Case 2  | 0.11/0.49/0.39                      |                                   | 1.73 (0.421)                       |
|            |                       | Control | 0.11/0.44/0.44                      |                                   | 3.81 (0.149)                       |
| rs1051730  | CC/CT/TT              | Case 1  | 0.45/0.47/0.08                      | 0.40/0.46/0.14                    | 2.28 (0.320)                       |
|            |                       | Case 2  | 0.36/0.52/0.12                      |                                   | 1.18 (0.555)                       |
|            |                       | Control | 0.49/0.33/0.17                      |                                   | 5.00 (0.082)                       |
| rs3764880* | m: A/G<br>f: AA/AG/GG | Case 1  | m: 0.70/0.30<br>f: 0.63/0.26/0.11   | m: 0.71/0.29<br>f: 0.55/0.37/0.08 | m: 0 (1)<br>f: 0.93 (0.630)        |
|            |                       | Case 2  | m: 0.81/0.19<br>f: 0.55/0.42/0.03   |                                   | m: 0.48 (0.486)<br>f: 1.92 (0.382) |
|            |                       | Control | m: 0.875/0.125<br>f: 0.57/0.40/0.03 |                                   | m: 2.14 (0.143)<br>f: 2,37 (0.306) |

\*m – male; f – female.
