# Supplementary material for: TLRs Gene Polymorphisms Associated with Pneumonia before and during COVID-19 Pandemic
Source: MDPI journal article supplement (doi:10.3390/diagnostics13010121), 2022-12-30
Supplement: s1 [file s1]

**Supplementary S1.** The comparison of allele frequencies against the EUR population for all studied SNPs

| Samples | SNP       | Minor allele,<br>(MAF) | HWE*, <i>p</i> | Fisher Exact test for equality of<br>allele frequencies, <i>p</i> |
|---------|-----------|------------------------|----------------|-------------------------------------------------------------------|
| Case 1  | rs5743551 | G (0.243)              | 0.056          | 0.332                                                             |
|         | rs5743708 | A (0.033)              | 1.000          | 0.573                                                             |
|         | rs3804100 | C (0.072)              | <b>0.040</b>   | 0.723                                                             |
|         | rs4986790 | G(0.079)               | 0.058          | 0.271                                                             |
|         | rs5743810 | A (0.368)              | 0.805          | 0.376                                                             |
|         | rs1051730 | T (0.316)              | 0.595          | 0.239                                                             |
|         | rs3764880 | G (0.274)              | 0.360**        | 0.903                                                             |
| Case 2  | rs5743551 | G (0.194)              | 0.074          | <b>0.015</b>                                                      |
|         | rs5743708 | A (0.018)              | 1.000          | 0.786                                                             |
|         | rs3804100 | C (0.029)              | 1.000          | 0.110                                                             |
|         | rs4986790 | G (0.100)              | 0.588          | <b>0.040</b>                                                      |
|         | rs5743810 | A (0.365)              | 0.643          | 0.310                                                             |
|         | rs1051730 | T (0.376)              | 0.487          | 0.864                                                             |
|         | rs3764880 | G (0.235)              | 0.519**        | 0.417                                                             |
| Control | rs5743551 | G (0.232)              | 0.396          | 0.140                                                             |
|         | rs5743708 | A (0.030)              | 1.000          | 0.616                                                             |
|         | rs3804100 | C (0.081)              | 1.000          | 0.352                                                             |
|         | rs4986790 | G (0.091)              | 0.572          | 0.077                                                             |
|         | rs5743810 | A (0.333)              | 1.000          | 0.056                                                             |
|         | rs1051730 | T (0.338)              | <b>0.013</b>   | 0.467                                                             |
|         | rs3764880 | G (0.213)              | 0.329**        | 0.150                                                             |
| EUR     | rs5743551 | G (0.285)              | <b>0.016</b>   |                                                                   |
|         | rs5743708 | A (0.024)              | 1.000          |                                                                   |
|         | rs3804100 | C (0.064)              | 1.000          |                                                                   |
|         | rs4986790 | G (0.057)              | 0.207          | -                                                                 |
|         | rs5743810 | A (0.409)              | 0.461          |                                                                   |
|         | rs1051730 | T (0.369)              | 0.632          |                                                                   |
|         | rs3764880 | G (0.269)              | 0.566**        |                                                                   |

\*Haldane Exact test for Hardy-Weinberg equilibrium (autosomal) using SELOME p-value

\*\*Graffelman-Weir exact test for Hardy-Weinberg equilibrium on the X-chromosome using SELOME p-value
